# Supplementary material
Source: Springer Nature journal article supplement (https://www.springermedizin.de/resource/supplementary/12885_2008_1421_MOESM5_ESM.pdf/9473100)
Supplement: MOESM5 [file 9473100]

Table 1

|                            | UbcH10(-) | UbcH10(+) | P-value |
|----------------------------|-----------|-----------|---------|
| <b>Age</b>                 |           |           | 0.674   |
| 65≥                        | 48        | 45        |         |
| 65<                        | 22        | 24        |         |
| <b>Gender</b>              |           |           | 0.779   |
| F                          | 42        | 43        |         |
| M                          | 28        | 26        |         |
| <b>Tumor size</b>          |           |           | 0.601   |
| T1,2                       | 29        | 26        |         |
| T3,4                       | 40        | 43        |         |
| <b>Lymph node</b>          |           |           | 0.587   |
| N0                         | 52        | 45        |         |
| N1                         | 19        | 23        |         |
| N2                         | 0         | 2         |         |
| <b>Histological Grade</b>  |           |           | < 0.001 |
| G1                         | 28        | 9         |         |
| G2                         | 39        | 46        |         |
| G3                         | 2         | 12        |         |
| <b>Histological type</b>   |           |           | 0.174   |
| Adenocarcinoma             | 67        | 69        |         |
| Mucinous carcinoma         | 2         | 0         |         |
| Signet ring-cell carcinoma | 2         | 0         |         |
| Adenoma                    | 6         | 0         |         |
